# Supplementary material for: Effects of Jumping Phase, Leading Limb, and Arena Surface Type on Forelimb Hoof Movement
Source: MDPI journal article supplement (doi:10.3390/ani13132122), 2023-06-27
Supplement: s1 [file s1]

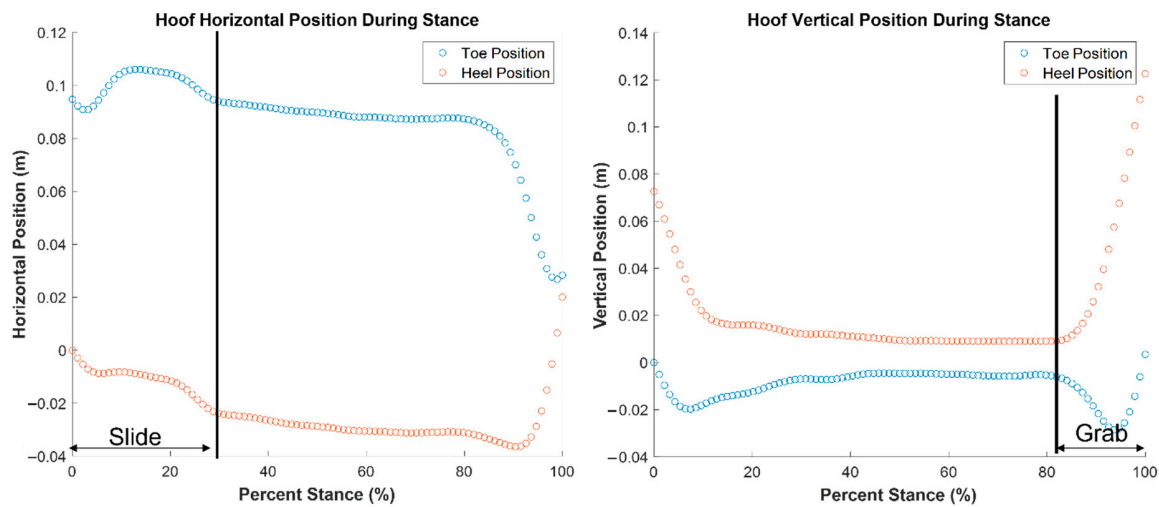

**Figure S1.** Subphases of stance: **(a)** Slide was defined as the region between the start of the stance phase and the end of horizontal hoof movement; **(b)** Grab was defined as the region near the end of stance where the toe sank deeper into the surface. Support captured the period of the stance phase between slide and grab, where horizontal and vertical hoof displacement were minimal. Graphs depict hoof movement for a single horse at landing.

#### *Univariate Correlations between Surface Properties and Hoof Movement*

Hoof displacement of the equine forelimb was linearly correlated with compositional variables (**Table S1**), manageable properties (**Table S2**), shear properties, and vertical impact properties (**Table S3**). Positive  $r$ -values between surface properties and hoof deceleration indicate greater hoof deceleration as the magnitude of that surface property increases. Positive  $r$ -values for horizontal translation and velocity are related to more movement in the direction of the center of mass of the horse, while positive  $r$ -values for vertical translation and velocity are related to more movement into the surface.

**Table S1:** Correlations (r-values) between compositional surface properties and hoof movement at takeoff and landing. Spearman correlations are noted with an asterisk (\*); otherwise coefficients represent Pearson correlations.

| TAKEOFF                           |              |                   |                  |                  |                                              |                                              |                                              |                                              |                             |
|-----------------------------------|--------------|-------------------|------------------|------------------|----------------------------------------------|----------------------------------------------|----------------------------------------------|----------------------------------------------|-----------------------------|
|                                   | Stance Phase | Fiber Content (%) | Sand Content (%) | Silt Content (%) | Clay Content (%)                             | Average Particle Size (mm)                   | Particle Size Deviation (mm)                 | Average Fiber Length (mm)                    | Fiber Length Deviation (mm) |
| Average Hoof Angle (°)            | Slide        | _* <sup>a</sup>   | _*               | -                | _*                                           | _*                                           | -                                            | _*                                           | _*                          |
|                                   | Support      | _*                | _*               | -                | _*                                           | _*                                           | -                                            | _*                                           | _*                          |
|                                   | Grab         | _*                | _*               | -                | -0.32*<br>( <i>P</i> =0.031)<br><i>n</i> =46 | _*                                           | -                                            | _*                                           | _*                          |
| Horizontal Toe Displacement (cm)  | Slide        | _*                | _*               | -                | _*                                           | _*                                           | -                                            | _*                                           | _*                          |
|                                   | Support      | _*                | _*               | _*               | _*                                           | _*                                           | _*                                           | _*                                           | _*                          |
|                                   | Grab         | _*                | _*               | -                | _*                                           | _*                                           | -                                            | _*                                           | _*                          |
| Vertical Toe Displacement (cm)    | Slide        | _*                | _*               | -                | _*                                           | _*                                           | -                                            | _*                                           | _*                          |
|                                   | Support      | _*                | _*               | _*               | _*                                           | _*                                           | _*                                           | _*                                           | _*                          |
|                                   | Grab         | _*                | _*               | -                | 0.35*<br>( <i>P</i> =0.016)<br><i>n</i> =46  | 0.33*<br>( <i>P</i> =0.023)<br><i>n</i> =46  | 0.34<br>( <i>P</i> =0.020)<br><i>n</i> =46   | -0.58*<br>( <i>P</i> =0.002)<br><i>n</i> =27 | _*                          |
| Horizontal Heel Displacement (cm) | Slide        | _*                | _*               | -                | _*                                           | _*                                           | -                                            | _*                                           | _*                          |
|                                   | Support      | _*                | _*               | _*               | _*                                           | _*                                           | -0.29*<br>( <i>P</i> =0.049)<br><i>n</i> =46 | _*                                           | _*                          |
|                                   | Grab         | _*                | _*               | -                | _*                                           | -0.31*<br>( <i>P</i> =0.034)<br><i>n</i> =46 | -0.30<br>( <i>P</i> =0.041)<br><i>n</i> =46  | 0.55*<br>( <i>P</i> =0.003)<br><i>n</i> =27  | _*                          |
| Vertical Heel Displacement (cm)   | Slide        | _*                | _*               | -                | -0.40*<br>( <i>P</i> =0.006)<br><i>n</i> =46 | -0.31*<br>( <i>P</i> =0.034)<br><i>n</i> =46 | -                                            | 0.64*<br>( <i>P</i> <0.001)<br><i>n</i> =27  | _*                          |
|                                   | Support      | _*                | _*               | -                | _*                                           | _*                                           | -                                            | _*                                           | _*                          |
|                                   | Grab         | _*                | _*               | -                | 0.42*<br>( <i>P</i> =0.004)<br><i>n</i> =46  | _*                                           | -                                            | -0.44*<br>( <i>P</i> =0.021)<br><i>n</i> =27 | _*                          |

<sup>a</sup> -: Denotes that the correlation between variables was not statistically significant (*P*>0.05).

| TAKEOFF                                                  |              |                                              |                                            |                  |                                              |                                              |                                              |                                              |                             |
|----------------------------------------------------------|--------------|----------------------------------------------|--------------------------------------------|------------------|----------------------------------------------|----------------------------------------------|----------------------------------------------|----------------------------------------------|-----------------------------|
|                                                          | Stance Phase | Fiber Content (%)                            | Sand Content (%)                           | Silt Content (%) | Clay Content (%)                             | Average Particle Size (mm)                   | Particle Size Deviation (mm)                 | Average Fiber Length (mm)                    | Fiber Length Deviation (mm) |
| Average Horizontal Toe Velocity (m/s)                    | Slide        | _* <sup>a</sup>                              | _*                                         | -                | _*                                           | _*                                           | -                                            | _*                                           | _*                          |
|                                                          | Support      | _*                                           | _*                                         | _*               | _*                                           | _*                                           | _*                                           | _*                                           | _*                          |
|                                                          | Grab         | _*                                           | _*                                         | _*               | _*                                           | _*                                           | _*                                           | _*                                           | _*                          |
| Average Vertical Toe Velocity (m/s)                      | Slide        | 0.33*<br>( <i>P</i> =0.025)<br><i>n</i> =46  | _*                                         | -                | _*                                           | _*                                           | -0.35<br>( <i>P</i> =0.017)<br><i>n</i> =46  | _*                                           | _*                          |
|                                                          | Support      | _*                                           | _*                                         | _*               | _*                                           | _*                                           | _*                                           | _*                                           | _*                          |
|                                                          | Grab         | _*                                           | _*                                         | -                | 0.38*<br>( <i>P</i> =0.009)<br><i>n</i> =46  | 0.33*<br>( <i>P</i> =0.027)<br><i>n</i> =46  | -                                            | -0.56*<br>( <i>P</i> =0.002)<br><i>n</i> =27 | _*                          |
| Average Horizontal Heel Velocity (m/s)                   | Slide        | _*                                           | _*                                         | -                | _*                                           | _*                                           | -                                            | NS*                                          | _*                          |
|                                                          | Support      | _*                                           | _*                                         | _*               | _*                                           | _*                                           | -0.30*<br>( <i>P</i> =0.041)<br><i>n</i> =46 | NS*                                          | _*                          |
|                                                          | Grab         | _*                                           | _*                                         | -                | _*                                           | _*                                           | -                                            | 0.52*<br>( <i>P</i> =0.006)<br><i>n</i> =27  | _*                          |
| Average Vertical Heel Velocity (m/s)                     | Slide        | 0.37*<br>( <i>P</i> =0.012)<br><i>n</i> =46  | _*                                         | -                | -0.38*<br>( <i>P</i> =0.010)<br><i>n</i> =46 | -0.42*<br>( <i>P</i> =0.004)<br><i>n</i> =46 | -0.46<br>( <i>P</i> =0.001)<br><i>n</i> =46  | 0.69*<br>( <i>P</i> <0.001)<br><i>n</i> =27  | _*                          |
|                                                          | Support      | _*                                           | _*                                         | -                | _*                                           | _*                                           | -                                            | _*                                           | _*                          |
|                                                          | Grab         | _*                                           | _*                                         | -                | _*                                           | _*                                           | -                                            | _*                                           | _*                          |
| Average Horizontal Toe Deceleration (m/s <sup>2</sup> )  | Slide        | _*                                           | 0.31<br>( <i>P</i> =0.037)<br><i>n</i> =46 | -                | _*                                           | _*                                           | -                                            | _*                                           | _*                          |
| Average Horizontal Heel Deceleration (m/s <sup>2</sup> ) | Slide        | -0.37*<br>( <i>P</i> =0.012)<br><i>n</i> =46 | _*                                         | -                | _*                                           | 0.33*<br>( <i>P</i> =0.028)<br><i>n</i> =46  | 0.42<br>( <i>P</i> =0.004)<br><i>n</i> =46   | _*                                           | _*                          |

<sup>a</sup> -: Denotes that the correlation between variables was not statistically significant (*P*>0.05).

| LANDING                           |              |                   |                                              |                  |                                              |                                              |                                             |                                             |                             |
|-----------------------------------|--------------|-------------------|----------------------------------------------|------------------|----------------------------------------------|----------------------------------------------|---------------------------------------------|---------------------------------------------|-----------------------------|
|                                   | Stance Phase | Fiber Content (%) | Sand Content (%)                             | Silt Content (%) | Clay Content (%)                             | Average Particle Size (mm)                   | Particle Size Deviation (mm)                | Average Fiber Length (mm)                   | Fiber Length Deviation (mm) |
| Average Hoof Angle (°)            | Slide        | _* <sup>a</sup>   | _*                                           | -                | _*                                           | _*                                           | -                                           | _*                                          | _*                          |
|                                   | Support      | _*                | _*                                           | -                | _*                                           | _*                                           | -                                           | _*                                          | _*                          |
|                                   | Grab         | _*                | 0.38*<br>( <i>P</i> =0.009)<br><i>n</i> =46  | -                | -0.53*<br>( <i>P</i> <0.001)<br><i>n</i> =46 | _*                                           | -                                           | _*                                          | _*                          |
| Horizontal Toe Displacement (cm)  | Slide        | _*                | _*                                           | -                | _*                                           | _*                                           | -                                           | _*                                          | _*                          |
|                                   | Support      | _*                | _*                                           | _*               | _*                                           | _*                                           | _*                                          | _*                                          | _*                          |
|                                   | Grab         | _*                | _*                                           | -                | _*                                           | _*                                           | -                                           | _*                                          | _*                          |
| Vertical Toe Displacement (cm)    | Slide        | _*                | _*                                           | -                | -0.42*<br>( <i>P</i> =0.004)<br><i>n</i> =46 | _*                                           | -                                           | _*                                          | _*                          |
|                                   | Support      | _*                | _*                                           | _*               | _*                                           | _*                                           | _*                                          | _*                                          | _*                          |
|                                   | Grab         | _*                | _*                                           | -                | 0.41*<br>( <i>P</i> =0.004)<br><i>n</i> =46  | 0.30*<br>( <i>P</i> =0.042)<br><i>n</i> =46  | 0.34<br>( <i>P</i> =0.023)<br><i>n</i> =46  | _*                                          | _*                          |
| Horizontal Heel Displacement (cm) | Slide        | _*                | _*                                           | -                | _*                                           | _*                                           | -                                           | _*                                          | _*                          |
|                                   | Support      | _*                | _*                                           | _*               | _*                                           | _*                                           | _*                                          | _*                                          | _*                          |
|                                   | Grab         | _*                | _*                                           | -                | -0.36*<br>( <i>P</i> =0.015)<br><i>n</i> =46 | -0.30*<br>( <i>P</i> =0.043)<br><i>n</i> =46 | -0.34<br>( <i>P</i> =0.022)<br><i>n</i> =46 | 0.46*<br>( <i>P</i> =0.017)<br><i>n</i> =27 | _*                          |
| Vertical Heel Displacement (cm)   | Slide        | _*                | _*                                           | -                | _*                                           | _*                                           | -                                           | _*                                          | _*                          |
|                                   | Support      | _*                | _*                                           | -                | _*                                           | _*                                           | -                                           | _*                                          | _*                          |
|                                   | Grab         | _*                | -0.37*<br>( <i>P</i> =0.011)<br><i>n</i> =46 | -                | 0.54*<br>( <i>P</i> <0.001)<br><i>n</i> =46  | _*                                           | -                                           | _*                                          | _*                          |

<sup>a</sup> -: Denotes that the correlation between variables was not statistically significant (*P*>0.05).

| LANDING                                                  |              |                   |                                              |                                            |                                              |                                              |                                             |                                             |                             |
|----------------------------------------------------------|--------------|-------------------|----------------------------------------------|--------------------------------------------|----------------------------------------------|----------------------------------------------|---------------------------------------------|---------------------------------------------|-----------------------------|
|                                                          | Stance Phase | Fiber Content (%) | Sand Content (%)                             | Silt Content (%)                           | Clay Content (%)                             | Average Particle Size (mm)                   | Particle Size Deviation (mm)                | Average Fiber Length (mm)                   | Fiber Length Deviation (mm) |
| Average Horizontal Toe Velocity (m/s)                    | Slide        | _* <sup>a</sup>   | _*                                           | -                                          | _*                                           | _*                                           | -                                           | _*                                          | _*                          |
|                                                          | Support      | _*                | _*                                           | _*                                         | _*                                           | _*                                           | _*                                          | _*                                          | _*                          |
|                                                          | Grab         | _*                | _*                                           | _*                                         | _*                                           | _*                                           | _*                                          | _*                                          | _*                          |
| Average Vertical Toe Velocity (m/s)                      | Slide        | _*                | _*                                           | -                                          | -0.37*<br>( <i>P</i> =0.011)<br><i>n</i> =46 | _*                                           | -                                           | _*                                          | _*                          |
|                                                          | Support      | _*                | _*                                           | _*                                         | _*                                           | _*                                           | _*                                          | _*                                          | _*                          |
|                                                          | Grab         | _*                | _*                                           | -                                          | 0.42*<br>( <i>P</i> =0.003)<br><i>n</i> =46  | _*                                           | 0.33<br>( <i>P</i> =0.026)<br><i>n</i> =46  | _*                                          | _*                          |
| Average Horizontal Heel Velocity (m/s)                   | Slide        | _*                | _*                                           | -                                          | _*                                           | _*                                           | -                                           | _*                                          | _*                          |
|                                                          | Support      | _*                | _*                                           | _*                                         | _*                                           | _*                                           | _*                                          | _*                                          | _*                          |
|                                                          | Grab         | _*                | _*                                           | -                                          | -0.48*<br>( <i>P</i> <0.001)<br><i>n</i> =46 | -0.31*<br>( <i>P</i> =0.039)<br><i>n</i> =46 | -0.32<br>( <i>P</i> =0.029)<br><i>n</i> =46 | 0.45*<br>( <i>P</i> =0.019)<br><i>n</i> =27 | _*                          |
| Average Vertical Heel Velocity (m/s)                     | Slide        | _*                | _*                                           | -                                          | _*                                           | _*                                           | -0.29<br>( <i>P</i> =0.047)<br><i>n</i> =46 | _*                                          | _*                          |
|                                                          | Support      | _*                | _*                                           | -                                          | _*                                           | _*                                           | -                                           | _*                                          | _*                          |
|                                                          | Grab         | _*                | -0.38*<br>( <i>P</i> =0.009)<br><i>n</i> =46 | 0.36<br>( <i>P</i> =0.014)<br><i>n</i> =46 | 0.43*<br>( <i>P</i> =0.003)<br><i>n</i> =46  | _*                                           | -                                           | _*                                          | _*                          |
| Average Horizontal Toe Deceleration (m/s <sup>2</sup> )  | Slide        | _*                | _*                                           | -                                          | _*                                           | _*                                           | -                                           | _*                                          | _*                          |
| Average Horizontal Heel Deceleration (m/s <sup>2</sup> ) | Slide        | _*                | _*                                           | -                                          | _*                                           | _*                                           | -                                           | _*                                          | _*                          |

<sup>a</sup> -: Denotes that the correlation between variables was not statistically significant (*P*>0.05).

**Table S2:** Correlations (r-values) between manageable surface properties and hoof movement at takeoff and landing. Spearman correlations are noted with an asterisk (\*); otherwise coefficients represent Pearson correlations.

| TAKEOFF                           |              |                                              |                                             |                      |
|-----------------------------------|--------------|----------------------------------------------|---------------------------------------------|----------------------|
|                                   | Stance Phase | Temperature (°C)                             | Cushion Depth (mm)                          | Moisture Content (%) |
| Average Hoof Angle (°)            | Slide        | -. <sup>a</sup>                              | -                                           | -. <sup>*</sup>      |
|                                   | Support      | -. <sup>*</sup>                              | -                                           | -. <sup>*</sup>      |
|                                   | Grab         | -. <sup>*</sup>                              | -                                           | -. <sup>*</sup>      |
| Horizontal Toe Displacement (cm)  | Slide        | -. <sup>*</sup>                              | -                                           | -. <sup>*</sup>      |
|                                   | Support      | -. <sup>*</sup>                              | -. <sup>*</sup>                             | -. <sup>*</sup>      |
|                                   | Grab         | -. <sup>*</sup>                              | -                                           | -. <sup>*</sup>      |
| Vertical Toe Displacement (cm)    | Slide        | -0.39*<br>( <i>P</i> =0.007)<br><i>n</i> =46 | -                                           | -. <sup>*</sup>      |
|                                   | Support      | -. <sup>*</sup>                              | 0.33*<br>( <i>P</i> =0.026)<br><i>n</i> =46 | -. <sup>*</sup>      |
|                                   | Grab         | 0.30*<br>( <i>P</i> =0.040)<br><i>n</i> =46  | -                                           | -. <sup>*</sup>      |
| Horizontal Heel Displacement (cm) | Slide        | -. <sup>*</sup>                              | -                                           | -. <sup>*</sup>      |
|                                   | Support      | -. <sup>*</sup>                              | -. <sup>*</sup>                             | -. <sup>*</sup>      |
|                                   | Grab         | -. <sup>*</sup>                              | -                                           | -. <sup>*</sup>      |
| Vertical Heel Displacement (cm)   | Slide        | -. <sup>*</sup>                              | 0.36<br>( <i>P</i> =0.015)<br><i>n</i> =46  | -. <sup>*</sup>      |
|                                   | Support      | -. <sup>*</sup>                              | -                                           | -. <sup>*</sup>      |
|                                   | Grab         | -. <sup>*</sup>                              | -                                           | -. <sup>*</sup>      |

<sup>a</sup> -: Denotes that the correlation between variables was not statistically significant (*P*>0.05).

| TAKEOFF                                                  |              |                                   |                                  |                      |
|----------------------------------------------------------|--------------|-----------------------------------|----------------------------------|----------------------|
|                                                          | Stance Phase | Temperature (°C)                  | Cushion Depth (mm)               | Moisture Content (%) |
| Average Horizontal Toe Velocity (m/s)                    | Slide        | _* <sup>a</sup>                   | -                                | _*                   |
|                                                          | Support      | _*                                | _*                               | _*                   |
|                                                          | Grab         | _*                                | _*                               | _*                   |
| Average Vertical Toe Velocity (m/s)                      | Slide        | -0.48*<br>( $P<0.001$ )<br>$n=46$ | -                                | _*                   |
|                                                          | Support      | _*                                | 0.33*<br>( $P=0.025$ )<br>$n=46$ | _*                   |
|                                                          | Grab         | _*                                | -                                | _*                   |
| Average Horizontal Heel Velocity (m/s)                   | Slide        | -0.36*<br>( $P=0.013$ )<br>$n=46$ | -                                | _*                   |
|                                                          | Support      | _*                                | _*                               | _*                   |
|                                                          | Grab         | _*                                | -                                | _*                   |
| Average Vertical Heel Velocity (m/s)                     | Slide        | _*                                | 0.40<br>( $P=0.006$ )<br>$n=46$  | _*                   |
|                                                          | Support      | _*                                | -                                | _*                   |
|                                                          | Grab         | _*                                | -                                | _*                   |
| Average Horizontal Toe Deceleration (m/s <sup>2</sup> )  | Slide        | _*                                | -                                | _*                   |
| Average Horizontal Heel Deceleration (m/s <sup>2</sup> ) | Slide        | -0.36<br>( $P=0.014$ )<br>$n=46$  | -                                | _*                   |

<sup>a</sup> -: Denotes that the correlation between variables was not statistically significant ( $P>0.05$ ).

| LANDING                           |              |                  |                    |                                   |
|-----------------------------------|--------------|------------------|--------------------|-----------------------------------|
|                                   | Stance Phase | Temperature (°C) | Cushion Depth (mm) | Moisture Content (%)              |
| Average Hoof Angle (°)            | Slide        | _* <sup>a</sup>  | -                  | _*                                |
|                                   | Support      | _*               | -                  | _*                                |
|                                   | Grab         | _*               | -                  | _*                                |
| Horizontal Toe Displacement (cm)  | Slide        | _*               | -                  | _*                                |
|                                   | Support      | _*               | -                  | _*                                |
|                                   | Grab         | _*               | -                  | _*                                |
| Vertical Toe Displacement (cm)    | Slide        | _*               | -                  | _*                                |
|                                   | Support      | _*               | _*                 | _*                                |
|                                   | Grab         | _*               | -                  | _*                                |
| Horizontal Heel Displacement (cm) | Slide        | _*               | -                  | _*                                |
|                                   | Support      | _*               | _*                 | _*                                |
|                                   | Grab         | _*               | -                  | -0.29*<br>( $P=0.050$ )<br>$n=46$ |
| Vertical Heel Displacement (cm)   | Slide        | _*               | -                  | _*                                |
|                                   | Support      | _*               | _*                 | _*                                |
|                                   | Grab         | _*               | -                  | _*                                |

<sup>a</sup> -: Denotes that the correlation between variables was not statistically significant ( $P>0.05$ ).

| LANDING                                                  |              |                  |                    |                      |
|----------------------------------------------------------|--------------|------------------|--------------------|----------------------|
|                                                          | Stance Phase | Temperature (°C) | Cushion Depth (mm) | Moisture Content (%) |
| Average Horizontal Toe Velocity (m/s)                    | Slide        | _* <sup>a</sup>  | -                  | _*                   |
|                                                          | Support      | _*               | -                  | _*                   |
|                                                          | Grab         | _*               | -                  | _*                   |
| Average Vertical Toe Velocity (m/s)                      | Slide        | _*               | -                  | _*                   |
|                                                          | Support      | _*               | _*                 | _*                   |
|                                                          | Grab         | _*               | _*                 | _*                   |
| Average Horizontal Heel Velocity (m/s)                   | Slide        | _*               | -                  | _*                   |
|                                                          | Support      | _*               | _*                 | _*                   |
|                                                          | Grab         | _*               | -                  | _*                   |
| Average Vertical Heel Velocity (m/s)                     | Slide        | _*               | -                  | _*                   |
|                                                          | Support      | _*               | _*                 | _*                   |
|                                                          | Grab         | _*               | -                  | _*                   |
| Average Horizontal Toe Deceleration (m/s <sup>2</sup> )  | Slide        | _*               | -                  | _*                   |
| Average Horizontal Heel Deceleration (m/s <sup>2</sup> ) | Slide        | _*               | -                  | _*                   |

<sup>a</sup> -: Denotes that the correlation between variables was not statistically significant ( $P>0.05$ ).

**Shear Surface Properties and Hoof Movement:** At takeoff horizontal toe deceleration was lower on surfaces with greater adhesion ( $r=-0.32$ ;  $P=0.032$ ), while at landing the heel had a greater vertical velocity on surfaces with greater adhesion ( $r=-0.41$ ;  $P=0.006$ ). No other hoof movement parameters were correlated with shear surface properties (adhesion, coefficient of friction, and maximum normalized shear force).



**Table S3:** Correlations (r-values) between vertical impact properties and hoof movement at takeoff and landing. Spearman correlations are noted with an asterisk (\*); otherwise coefficients represent Pearson correlations.

| TAKEOFF                           |              |                                            |                                             |                     |                                    |                                            |                       |                  |                          |
|-----------------------------------|--------------|--------------------------------------------|---------------------------------------------|---------------------|------------------------------------|--------------------------------------------|-----------------------|------------------|--------------------------|
|                                   | Stance Phase | Maximum Vertical Impact Force (kN)         | Impulse (N*s)                               | Loading Rate (kN/s) | Maximum Vertical Displacement (cm) | Soil Rebound (cm)                          | Dissipated Energy (J) | Stiffness (kN/m) | Maximum Deceleration (g) |
| Average Hoof Angle (°)            | Slide        | _ <sup>a</sup>                             | -                                           | _*                  | -                                  | -                                          | -                     | _*               | _*                       |
|                                   | Support      | -                                          | -                                           | _*                  | -                                  | -                                          | -                     | _*               | _*                       |
|                                   | Grab         | -                                          | -                                           | _*                  | -                                  | -                                          | -                     | _*               | _*                       |
| Horizontal Toe Displacement (cm)  | Slide        | -                                          | -                                           | _*                  | -                                  | -                                          | -                     | _*               | _*                       |
|                                   | Support      | _*                                         | _*                                          | _*                  | _*                                 | _*                                         | _*                    | _*               | _*                       |
|                                   | Grab         | -                                          | -                                           | _*                  | -                                  | -                                          | -                     | _*               | _*                       |
| Vertical Toe Displacement (cm)    | Slide        | -                                          | -                                           | _*                  | -                                  | -                                          | -                     | _*               | _*                       |
|                                   | Support      | _*                                         | _*                                          | _*                  | _*                                 | _*                                         | _*                    | _*               | _*                       |
|                                   | Grab         | -                                          | -0.35<br>( <i>P</i> =0.018)<br><i>n</i> =45 | _*                  | -                                  | -                                          | -                     | _*               | _*                       |
| Horizontal Heel Displacement (cm) | Slide        | -                                          | -                                           | _*                  | -                                  | -                                          | -                     | _*               | _*                       |
|                                   | Support      | _*                                         | _*                                          | _*                  | _*                                 | _*                                         | _*                    | _*               | _*                       |
|                                   | Grab         | -                                          | -                                           | _*                  | -                                  | -                                          | -                     | _*               | _*                       |
| Vertical Heel Displacement (cm)   | Slide        | -                                          | -                                           | _*                  | -                                  | 0.38<br>( <i>P</i> =0.010)<br><i>n</i> =44 | -                     | _*               | _*                       |
|                                   | Support      | -                                          | -                                           | _*                  | -                                  | -                                          | -                     | _*               | _*                       |
|                                   | Grab         | 0.33<br>( <i>P</i> =0.026)<br><i>n</i> =45 | -                                           | _*                  | -                                  | -                                          | -                     | _*               | _*                       |

<sup>a</sup> -: Denotes that the correlation between variables was not statistically significant (*P*>0.05).

| TAKEOFF                                                  |              |                                    |                                            |                     |                                    |                                            |                       |                  |                          |
|----------------------------------------------------------|--------------|------------------------------------|--------------------------------------------|---------------------|------------------------------------|--------------------------------------------|-----------------------|------------------|--------------------------|
|                                                          | Stance Phase | Maximum Vertical Impact Force (kN) | Impulse (N*s)                              | Loading Rate (kN/s) | Maximum Vertical Displacement (cm) | Soil Rebound (cm)                          | Dissipated Energy (J) | Stiffness (kN/m) | Maximum Deceleration (g) |
| Average Horizontal Toe Velocity (m/s)                    | Slide        | _ <sup>a</sup>                     | -                                          | _*                  | -                                  | -                                          | -                     | _*               | _*                       |
|                                                          | Support      | _*                                 | _*                                         | _*                  | _*                                 | _*                                         | _*                    | _*               | _*                       |
|                                                          | Grab         | _*                                 | _*                                         | _*                  | _*                                 | _*                                         | _*                    | _*               | _*                       |
| Average Vertical Toe Velocity (m/s)                      | Slide        | -                                  | -                                          | _*                  | -                                  | -                                          | -                     | _*               | _*                       |
|                                                          | Support      | _*                                 | _*                                         | _*                  | _*                                 | _*                                         | _*                    | _*               | _*                       |
|                                                          | Grab         | -                                  | -                                          | _*                  | -                                  | -                                          | -                     | _*               | _*                       |
| Average Horizontal Heel Velocity (m/s)                   | Slide        | -                                  | -                                          | _*                  | -                                  | -                                          | -                     | _*               | _*                       |
|                                                          | Support      | _*                                 | _*                                         | _*                  | _*                                 | _*                                         | _*                    | _*               | _*                       |
|                                                          | Grab         | -                                  | -                                          | _*                  | -                                  | -                                          | -                     | _*               | _*                       |
| Average Vertical Heel Velocity (m/s)                     | Slide        | -                                  | 0.33<br>( <i>P</i> =0.029)<br><i>n</i> =45 | _*                  | -                                  | 0.46<br>( <i>P</i> =0.002)<br><i>n</i> =44 | -                     | _*               | _*                       |
|                                                          | Support      | -                                  | -                                          | _*                  | -                                  | -                                          | -                     | _*               | _*                       |
|                                                          | Grab         | -                                  | -                                          | _*                  | -                                  | -                                          | -                     | _*               | _*                       |
| Average Horizontal Toe Deceleration (m/s <sup>2</sup> )  | Slide        | -                                  | -                                          | _*                  | -                                  | -                                          | -                     | _*               | _*                       |
| Average Horizontal Heel Deceleration (m/s <sup>2</sup> ) | Slide        | -                                  | -                                          | _*                  | -                                  | -                                          | -                     | _*               | _*                       |

<sup>a</sup> -: Denotes that the correlation between variables was not statistically significant (*P*>0.05).

| LANDING                           |              |                                            |                                             |                                             |                                    |                                              |                                            |                                             |                                              |
|-----------------------------------|--------------|--------------------------------------------|---------------------------------------------|---------------------------------------------|------------------------------------|----------------------------------------------|--------------------------------------------|---------------------------------------------|----------------------------------------------|
|                                   | Stance Phase | Maximum Vertical Impact Force (kN)         | Impulse (N*s)                               | Loading Rate (kN/s)                         | Maximum Vertical Displacement (cm) | Soil Rebound (cm)                            | Dissipated Energy (J)                      | Stiffness (kN/m)                            | Maximum Deceleration (g)                     |
| Average Hoof Angle (°)            | Slide        | _ <sup>a</sup>                             | -                                           | _*                                          | -                                  | -                                            | -                                          | _*                                          | _*                                           |
|                                   | Support      | -                                          | -                                           | _*                                          | -                                  | -                                            | -                                          | _*                                          | _*                                           |
|                                   | Grab         | -                                          | -                                           | _*                                          | -                                  | -                                            | -                                          | _*                                          | -0.33*<br>( <i>P</i> =0.026)<br><i>n</i> =45 |
| Horizontal Toe Displacement (cm)  | Slide        | -                                          | -                                           | _*                                          | -                                  | -                                            | -                                          | _*                                          | _*                                           |
|                                   | Support      | _*                                         | _*                                          | _*                                          | _*                                 | -0.39*<br>( <i>P</i> =0.010)<br><i>n</i> =44 | _*                                         | _*                                          | _*                                           |
|                                   | Grab         | -                                          | -                                           | _*                                          | -                                  | -                                            | 0.40<br>( <i>P</i> =0.007)<br><i>n</i> =44 | _*                                          | 0.31*<br>( <i>P</i> =0.039)<br><i>n</i> =45  |
| Vertical Toe Displacement (cm)    | Slide        | -                                          | 0.31<br>( <i>P</i> =0.039)<br><i>n</i> =45  | _*                                          | -                                  | -                                            | -                                          | _*                                          | _*                                           |
|                                   | Support      | _*                                         | _*                                          | _*                                          | _*                                 | _*                                           | _*                                         | _*                                          | _*                                           |
|                                   | Grab         | -                                          | -0.30<br>( <i>P</i> =0.046)<br><i>n</i> =45 | _*                                          | -                                  | -                                            | -                                          | _*                                          | _*                                           |
| Horizontal Heel Displacement (cm) | Slide        | -                                          | -                                           | _*                                          | -                                  | -                                            | -                                          | _*                                          | _*                                           |
|                                   | Support      | _*                                         | _*                                          | _*                                          | _*                                 | -0.32*<br>( <i>P</i> =0.034)<br><i>n</i> =44 | _*                                         | _*                                          | _*                                           |
|                                   | Grab         | -                                          | -                                           | _*                                          | -                                  | -                                            | -                                          | _*                                          | _*                                           |
| Vertical Heel Displacement (cm)   | Slide        | -                                          | -                                           | _*                                          | -                                  | -                                            | -                                          | _*                                          | _*                                           |
|                                   | Support      | -                                          | -                                           | _*                                          | -                                  | -                                            | -                                          | _*                                          | _*                                           |
|                                   | Grab         | 0.38<br>( <i>P</i> =0.009)<br><i>n</i> =45 | -                                           | 0.44*<br>( <i>P</i> =0.023)<br><i>n</i> =45 | -                                  | -                                            | 0.30<br>( <i>P</i> =0.045)<br><i>n</i> =44 | 0.38*<br>( <i>P</i> =0.011)<br><i>n</i> =44 | 0.40*<br>( <i>P</i> =0.006)<br><i>n</i> =45  |

<sup>a</sup> -: Denotes that the correlation between variables was not statistically significant (*P*>0.05).

| LANDING                                                  |              |                                    |               |                                              |                                    |                                              |                                             |                                              |                                              |
|----------------------------------------------------------|--------------|------------------------------------|---------------|----------------------------------------------|------------------------------------|----------------------------------------------|---------------------------------------------|----------------------------------------------|----------------------------------------------|
|                                                          | Stance Phase | Maximum Vertical Impact Force (kN) | Impulse (N*s) | Loading Rate (kN/s)                          | Maximum Vertical Displacement (cm) | Soil Rebound (cm)                            | Dissipated Energy (J)                       | Stiffness (kN/m)                             | Maximum Deceleration (g)                     |
| Average Horizontal Toe Velocity (m/s)                    | Slide        | _ <sup>a</sup>                     | -             | _*                                           | -                                  | -                                            | -                                           | _*                                           | _*                                           |
|                                                          | Support      | _*                                 | _*            | _*                                           | _*                                 | -0.34*<br>( <i>P</i> =0.024)<br><i>n</i> =44 | _*                                          | _*                                           | _*                                           |
|                                                          | Grab         | _*                                 | _*            | _*                                           | _*                                 | _*                                           | 0.34*<br>( <i>P</i> =0.026)<br><i>n</i> =44 | _*                                           | _*                                           |
| Average Vertical Toe Velocity (m/s)                      | Slide        | -                                  | -             | _*                                           | -                                  | -                                            | -                                           | _*                                           | _*                                           |
|                                                          | Support      | _*                                 | _*            | _*                                           | _*                                 | _*                                           | _*                                          | _*                                           | _*                                           |
|                                                          | Grab         | -                                  | -             | _*                                           | -                                  | -                                            | -                                           | 0.31*<br>( <i>P</i> =0.043)<br><i>n</i> =44  | _*                                           |
| Average Horizontal Heel Velocity (m/s)                   | Slide        | -                                  | -             | _*                                           | -                                  | -                                            | -                                           | _*                                           | _*                                           |
|                                                          | Support      | _*                                 | _*            | _*                                           | _*                                 | _*                                           | 0.31*<br>( <i>P</i> =0.043)<br><i>n</i> =44 | _*                                           | _*                                           |
|                                                          | Grab         | -                                  | -             | -0.34*<br>( <i>P</i> =0.023)<br><i>n</i> =45 | -                                  | -                                            | -                                           | -0.31*<br>( <i>P</i> =0.043)<br><i>n</i> =44 | -0.32*<br>( <i>P</i> =0.035)<br><i>n</i> =45 |
| Average Vertical Heel Velocity (m/s)                     | Slide        | -                                  | -             | _*                                           | -                                  | -                                            | -                                           | _*                                           | _*                                           |
|                                                          | Support      | -                                  | -             | _*                                           | -                                  | -                                            | -                                           | _*                                           | _*                                           |
|                                                          | Grab         | -                                  | -             | _*                                           | -                                  | -                                            | -                                           | _*                                           | 0.38*<br>( <i>P</i> =0.011)<br><i>n</i> =45  |
| Average Horizontal Toe Deceleration (m/s <sup>2</sup> )  | Slide        | -                                  | -             | _*                                           | -                                  | -                                            | -                                           | _*                                           | _*                                           |
| Average Horizontal Heel Deceleration (m/s <sup>2</sup> ) | Slide        | -                                  | -             | _*                                           | -                                  | -                                            | -                                           | _*                                           | _*                                           |

<sup>a</sup> -: Denotes that the correlation between variables was not statistically significant (*P*>0.05).

**Table S4:** Multivariate stepwise regression results between surface properties and hoof movement at takeoff and landing. Partial r values for each variable are reported, indicating the amount of variation in the dependent variable explained by each independent variable. For slide, positive values indicate more displacement or velocity in the direction of horse movement or into the surface. For support, positive values indicate more displacement or velocity opposite to the direction of horse movement or into the surface. For the toe during grab, positive values indicate more displacement or velocity opposite to the direction of horse movement or out of the surface. For the heel during grab, positive values indicate more displacement or velocity in the direction of horse movement or out of the surface.

| TAKEOFF                           |              |                                                 |                                             |                                      |                        |
|-----------------------------------|--------------|-------------------------------------------------|---------------------------------------------|--------------------------------------|------------------------|
|                                   | Stance Phase | Independent Variable 1                          | Independent Variable 2                      | Independent Variable 3               | Independent Variable 4 |
| Average Hoof Angle (°)            | Slide        | - <sup>a</sup>                                  |                                             |                                      |                        |
|                                   | Support      | Cushion Depth<br>r=-0.35<br>(P=0.018)           |                                             |                                      |                        |
|                                   | Grab         | -                                               |                                             |                                      |                        |
| Horizontal Toe Displacement (cm)  | Slide        | -                                               |                                             |                                      |                        |
|                                   | Support      | -                                               |                                             |                                      |                        |
|                                   | Grab         | Maximum Deceleration<br>r=-0.32<br>(P=0.041)    |                                             |                                      |                        |
| Vertical Toe Displacement (cm)    | Slide        | -                                               |                                             |                                      |                        |
|                                   | Support      | Temperature<br>r=0.35<br>(P=0.023)              | Cushion Depth<br>r=0.44<br>(P=0.002)        |                                      |                        |
|                                   | Grab         | Vertical Impact Impulse<br>r=-0.40<br>(P=0.008) |                                             |                                      |                        |
| Horizontal Heel Displacement (cm) | Slide        | -                                               |                                             |                                      |                        |
|                                   | Support      | -                                               |                                             |                                      |                        |
|                                   | Grab         | Particle Size Variation<br>r=-0.32<br>(P=0.038) |                                             |                                      |                        |
| Vertical Heel Displacement (cm)   | Slide        | Average Fiber Length<br>r=0.62<br>(P<0.001)     | Soil Rebound<br>r=0.39<br>(P=0.010)         | Clay Content<br>r=-0.33<br>(P=0.022) |                        |
|                                   | Support      | -                                               |                                             |                                      |                        |
|                                   | Grab         | Maximum Deceleration<br>r=-0.33<br>(P=0.027)    | Average Fiber Length<br>r=0.40<br>(P=0.041) |                                      |                        |

<sup>a</sup> -: Denotes that the dependent variable was not related to any independent variables (P>0.05).

| TAKEOFF                                                  |              |                                                       |                                            |                        |                        |
|----------------------------------------------------------|--------------|-------------------------------------------------------|--------------------------------------------|------------------------|------------------------|
|                                                          | Stance Phase | Independent Variable 1                                | Independent Variable 2                     | Independent Variable 3 | Independent Variable 4 |
| Average Horizontal Toe Velocity (m/s)                    | Slide        | - <sup>a</sup>                                        |                                            |                        |                        |
|                                                          | Support      | -                                                     |                                            |                        |                        |
|                                                          | Grab         | -                                                     |                                            |                        |                        |
| Average Vertical Toe Velocity (m/s)                      | Slide        | Temperature<br>$r=-0.42$<br>( $P=0.005$ )             |                                            |                        |                        |
|                                                          | Support      | Temperature<br>$r=0.41$<br>( $P=0.007$ )              | Cushion Depth<br>$r=0.40$<br>( $P=0.004$ ) |                        |                        |
|                                                          | Grab         | Particle Size Variation<br>$r=-0.33$<br>( $P=0.030$ ) |                                            |                        |                        |
| Average Horizontal Heel Velocity (m/s)                   | Slide        | -                                                     |                                            |                        |                        |
|                                                          | Support      | -                                                     |                                            |                        |                        |
|                                                          | Grab         | -                                                     |                                            |                        |                        |
| Average Vertical Heel Velocity (m/s)                     | Slide        | Soil Rebound<br>$r=0.33$<br>( $P=0.012$ )             | Clay Content<br>$r=-0.49$<br>( $P=0.004$ ) |                        |                        |
|                                                          | Support      | -                                                     |                                            |                        |                        |
|                                                          | Grab         | -                                                     |                                            |                        |                        |
| Average Horizontal Toe Deceleration (m/s <sup>2</sup> )  | Slide        | Temperature<br>$r=-0.30$<br>( $P=0.047$ )             |                                            |                        |                        |
| Average Horizontal Heel Deceleration (m/s <sup>2</sup> ) | Slide        | Particle Size Variation<br>$r=-0.41$<br>( $P=0.005$ ) |                                            |                        |                        |

<sup>a</sup> -: Denotes that the dependent variable was not related to any independent variables ( $P>0.05$ ).

| LANDING                           |              |                                                     |                                               |                                            |                                     |
|-----------------------------------|--------------|-----------------------------------------------------|-----------------------------------------------|--------------------------------------------|-------------------------------------|
|                                   | Stance Phase | Independent Variable 1                              | Independent Variable 2                        | Independent Variable 3                     | Independent Variable 4              |
| Average Hoof Angle (°)            | Slide        | - <sup>a</sup>                                      |                                               |                                            |                                     |
|                                   | Support      | -                                                   |                                               |                                            |                                     |
|                                   | Grab         | Clay Content<br>r=-0.42<br>(P=0.004)                |                                               |                                            |                                     |
| Horizontal Toe Displacement (cm)  | Slide        | Adhesion<br>r=0.33<br>(P=0.031)                     |                                               |                                            |                                     |
|                                   | Support      | Dissipated Energy at Impact<br>r=-0.32<br>(P=0.042) |                                               |                                            |                                     |
|                                   | Grab         | Dissipated Energy at Impact<br>r=-0.46<br>(P=0.002) |                                               |                                            |                                     |
| Vertical Toe Displacement (cm)    | Slide        | Clay Content<br>r=-0.33<br>(P=0.031)                |                                               |                                            |                                     |
|                                   | Support      | -                                                   |                                               |                                            |                                     |
|                                   | Grab         | Particle Size Variation<br>r=-0.37<br>(P=0.013)     |                                               |                                            |                                     |
| Horizontal Heel Displacement (cm) | Slide        | Adhesion<br>r=0.32<br>(P=0.041)                     |                                               |                                            |                                     |
|                                   | Support      | Adhesion<br>r=0.32<br>(P=0.030)                     |                                               |                                            |                                     |
|                                   | Grab         | Clay Content<br>r=-0.39<br>(P=0.009)                |                                               |                                            |                                     |
| Vertical Heel Displacement (cm)   | Slide        | -                                                   |                                               |                                            |                                     |
|                                   | Support      | -                                                   |                                               |                                            |                                     |
|                                   | Grab         | Clay Content<br>r=-0.46<br>(P=0.002)                | Vertical Loading Rate<br>r=-0.28<br>(P=0.042) | Vertical Stiffness<br>r=-0.33<br>(P=0.011) | Sand Content<br>r=0.28<br>(P=0.019) |

<sup>a</sup> -: Denotes that the dependent variable was not related to any independent variables ( $P>0.05$ ).

| LANDING                                                  |              |                                                           |                                                     |                        |                        |
|----------------------------------------------------------|--------------|-----------------------------------------------------------|-----------------------------------------------------|------------------------|------------------------|
|                                                          | Stance Phase | Independent Variable 1                                    | Independent Variable 2                              | Independent Variable 3 | Independent Variable 4 |
| Average Horizontal Toe Velocity (m/s)                    | Slide        | Adhesion<br>$r=0.36$<br>( $P=0.015$ )                     |                                                     |                        |                        |
|                                                          | Support      | Dissipated Energy at Impact<br>$r=-0.32$<br>( $P=0.041$ ) |                                                     |                        |                        |
|                                                          | Grab         | Dissipated Energy at Impact<br>$r=-0.37$<br>( $P=0.014$ ) |                                                     |                        |                        |
| Average Vertical Toe Velocity (m/s)                      | Slide        | Clay Content<br>$r=-0.45$<br>( $P=0.003$ )                |                                                     |                        |                        |
|                                                          | Support      | - <sup>a</sup>                                            |                                                     |                        |                        |
|                                                          | Grab         | Clay Content<br>$r=-0.42$<br>( $P=0.005$ )                | Average Particle Size<br>$r=-0.28$<br>( $P=0.044$ ) |                        |                        |
| Average Horizontal Heel Velocity (m/s)                   | Slide        | Adhesion<br>$r=0.36$<br>( $P=0.020$ )                     |                                                     |                        |                        |
|                                                          | Support      | -                                                         |                                                     |                        |                        |
|                                                          | Grab         | Clay Content<br>$r=-0.5$<br>( $P<0.001$ )                 |                                                     |                        |                        |
| Average Vertical Heel Velocity (m/s)                     | Slide        | -                                                         |                                                     |                        |                        |
|                                                          | Support      | -                                                         |                                                     |                        |                        |
|                                                          | Grab         | Adhesion<br>$r=0.41$<br>( $P=0.005$ )                     |                                                     |                        |                        |
| Average Horizontal Toe Deceleration (m/s <sup>2</sup> )  | Slide        | Adhesion<br>$r=0.33$<br>( $P=0.027$ )                     |                                                     |                        |                        |
| Average Horizontal Heel Deceleration (m/s <sup>2</sup> ) | Slide        | Adhesion<br>$r=0.33$<br>( $P=0.027$ )                     |                                                     |                        |                        |

<sup>a</sup> -: Denotes that the dependent variable was not related to any independent variables ( $P>0.05$ ).
